# Supplementary material
Source: MDPI journal article supplement (https://www.mdpi.com/2071-1050/12/12/5207)
Supplement: s1 [file s1]

**Table S1.** Results of mixed effects negative binomial regression analysis to examine relationships between fecal source (recreation, grazing, and rural residences) and fecal indicator bacteria (*E. coli* and fecal coliform) concentrations (cfu/100 mL) for 595 water samples collected across 77 stream sample sites sustaining perennial streamflow throughout the entire summer sampling period (July through September of 2016).

| Model Parameter                   | <i>E. coli</i>     |                 | Fecal Coliform     |                 |
|-----------------------------------|--------------------|-----------------|--------------------|-----------------|
|                                   | Coefficient (S.E.) | <i>p</i> -Value | Coefficient (S.E.) | <i>p</i> -Value |
| <b>Fixed Effects</b>              |                    |                 |                    |                 |
| Fecal Source (FS)                 |                    |                 |                    |                 |
| Grazing <sup>1</sup>              | --                 | --              | --                 | --              |
| Recreation <sup>2</sup>           | -0.66 (0.33)       | 0.045           | -0.43 (0.32)       | 0.174           |
| Residences <sup>2</sup>           | 1.41 (0.61)        | 0.020           | 1.86 (0.59)        | 0.002           |
| Intercept                         | 3.24 (0.25)        | < 0.001         | 4.11 (0.24)        | < 0.001         |
| <b>Random Intercept</b>           |                    |                 |                    |                 |
| Sample Site Identity <sup>3</sup> | 1.88 (0.33)        | --              | 1.63 (0.32)        | --              |

<sup>1</sup> Referent condition for fecal source during the analyses, thus no coefficient is generated. <sup>2</sup> Post-hoc pairwise comparison indicated rural residence coefficient significantly different from recreation for *E. coli* (*p*-Value < 0.001) and fecal coliform (*p*-Value < 0.001). <sup>3</sup> Likelihood-ratio tests confirmed the random intercept negative binomial model was significantly superior to standard negative binomial regression for both *E. coli* and fecal coliform.
